# Supplementary material for: Quantum confined two-dimensional electron/hole gas switching by facet orientation of perovskite oxides
Source: Royal Society of Chemistry journal article supplement (doi:10.1039/c8ra03928c), 2018-01-01
Supplement: c8ra03928c1.pdf [file c8ra03928c1.pdf]

## Supporting Information

### Quantum confined two-dimensional electron/hole gas switching by facet orientation of perovskite oxides

Fei Zhou,<sup>†,‡</sup> Yong Liu,<sup>†,§</sup> Zhonghong Lai,<sup>⊥</sup> Mingqing Liao,<sup>†</sup> Yi Zhou,<sup>†</sup> Yudong Huang,<sup>‡</sup> and Jingchuan Zhu<sup>\*,†,§,⊥</sup>

<sup>†</sup> School of Materials Science and Engineering, Harbin Institute of Technology, 150001, Harbin, China

<sup>‡</sup> MIIT Key Laboratory of Critical Materials Technology for New Energy Conversion and Storage, School of Chemistry and Chemical Engineering, Harbin Institute of Technology, 150001, Harbin, China

<sup>§</sup> National Key Laboratory of Science and Technology on Advanced Composites in Special Environments, Harbin Institute of Technology, 150001, Harbin, China

<sup>⊥</sup> National Key Laboratory for Precision Hot Processing of Metals, Harbin Institute of Technology, 150001, Harbin, China

<sup>⊥</sup> Analysis and Testing Center, Harbin Institute of Technology, 150001, Harbin, China

\* E-mail: fgms@hit.edu.cn

#### 1. Computational methods

The first-principle calculation is performed with the Cambridge Serial Total Energy Package<sup>1</sup>. 2D crystal models are fully relaxed through geometry optimization according to system energy, force and stress by DFT with the Perdew, Burke, and Ernzerhof functional<sup>2</sup>. For our main objective is qualitatively investigating the behaviors of quantum confined free electronic states, ultrasoft pseudopotentials are applied to describe the ionic cores with a plane-wave cutoff energy of 340 eV. The  $k$ -point sampling grids are  $3 \times 3 \times 1$  for 2D crystal slabs and  $4 \times 4 \times 2$  for bulk  $\text{KNbO}_3$  crystal, respectively. The vacuum spacing layer between neighboring repeat units of 2D slabs are set to 1 nm. The truncated surface are capped by H atoms, in order to neutralize the surface dangling oxygen bonds.

The surface energy  $E_s$  is computed using the formula  $E_s = (E_{\text{slab}} - nE_{\text{bulk}}) / 2A$ <sup>3</sup>, where  $E_{\text{slab}}$  and  $E_{\text{bulk}}$  are the total energy of the 2D slab and the bulk per unit cell, respectively. They are all obtained by DFT calculation.  $n$  is the number of bulk unit cell contained in the 2D slab.  $2A$  is the surface area of each 2D slabs.

## 2. Surface crystal models of different facets

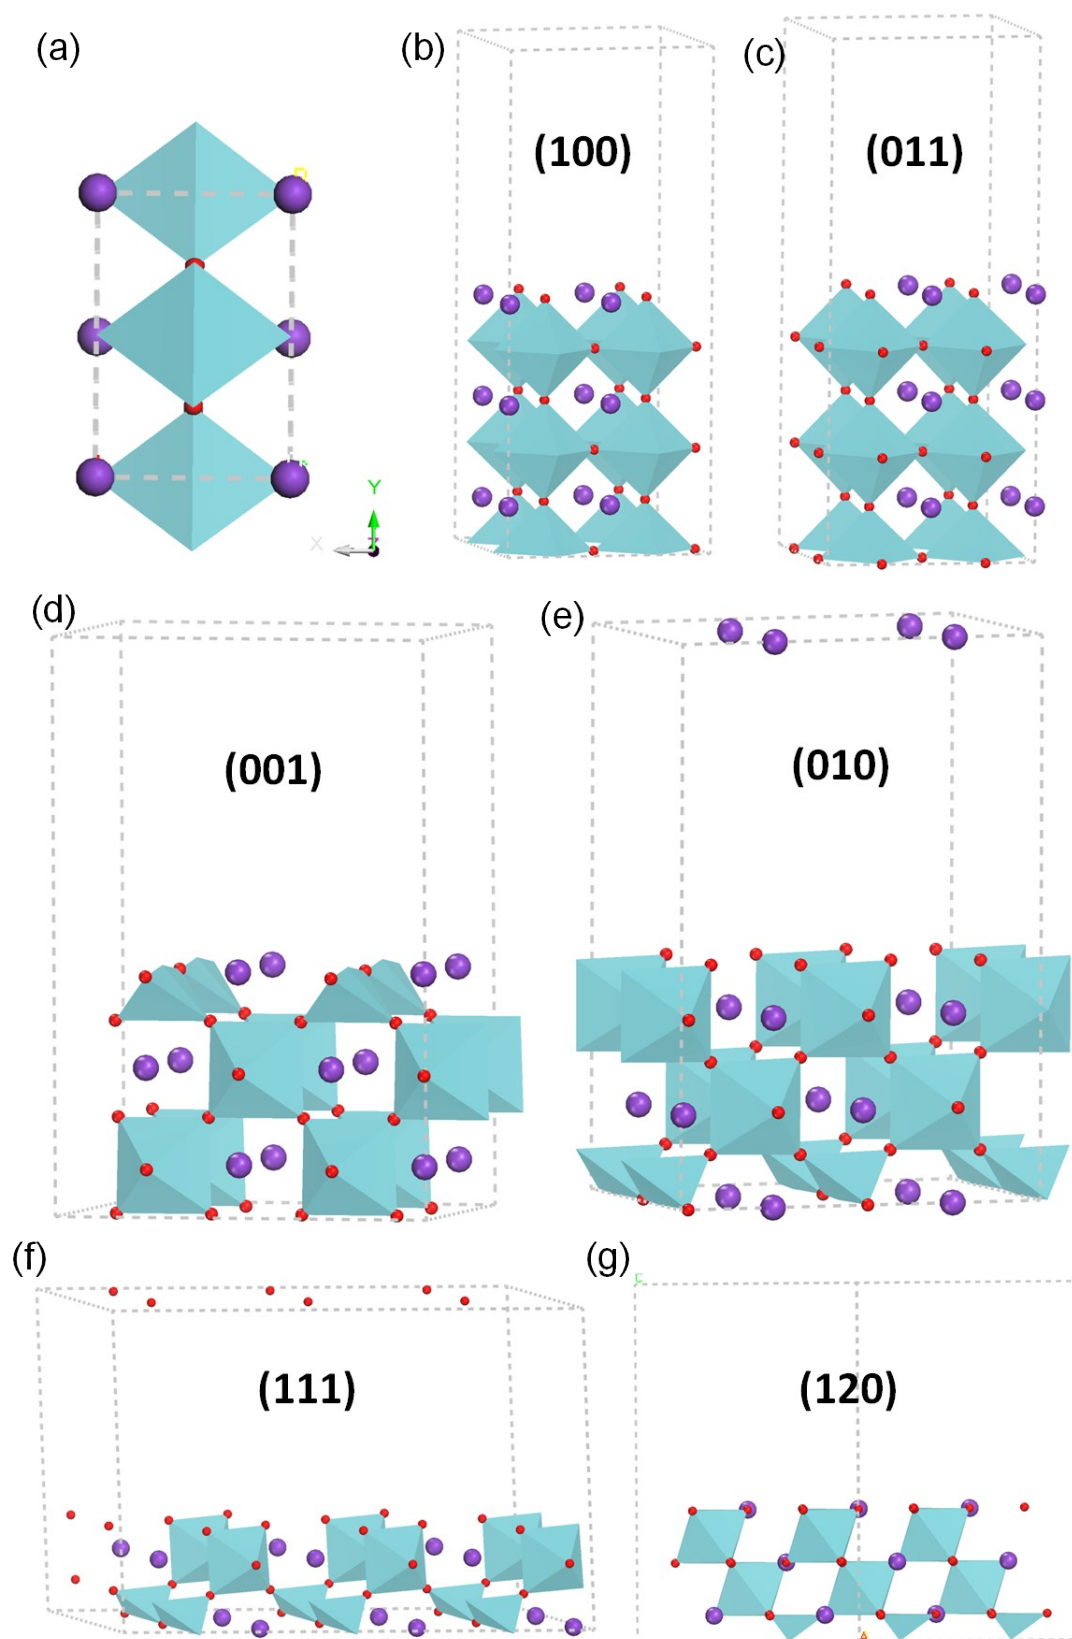

**Fig. S1** (a) Bulk crystal model of  $Amm2$  orthorhombic  $KNbO_3$ ; (b)-(g) Two-dimensional crystal models of surface of  $(100)$ ,  $(011)$ ,  $(001)$ ,  $(010)$ ,  $(111)$ ,  $(120)$  facets.

### 3. Band structure of trilayers models of 2D KNbO<sub>3</sub>

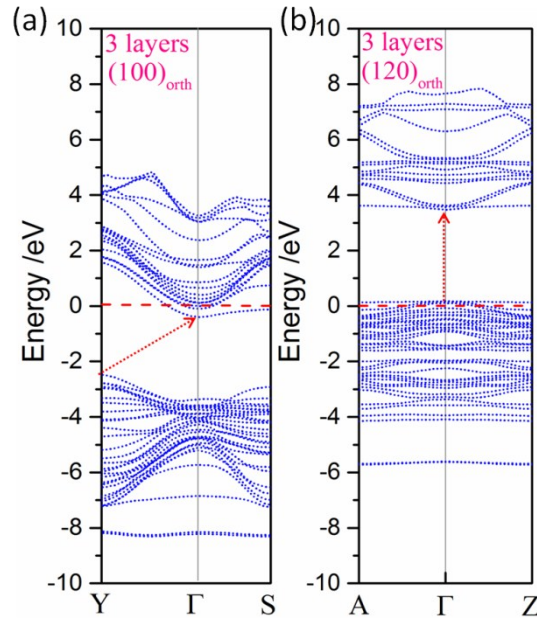

**Fig. S2** (a) Band structure of (100) facet 2D KNbO<sub>3</sub>, the conductive  $t_{2g}$  band descend below  $E_F$  allowing the electrons moving freely on these bands. The minimum optical band gap shows that the electronic states transit from Y to  $\Gamma$  (indicated by red arrows), indicating a indirect band transition. (b) Band structure of (120) facet 2D KNbO<sub>3</sub>, the O 2p subbands lift up above  $E_F$  showing as free hole conduction. The preferential geometric structure changes the symmetry of electronic state transition, where (120) oriented facet showing a direct band transition, as indicated by red arrow.

### 4. Geometric structure models of (100)<sub>orth</sub> oriented 2D crystal

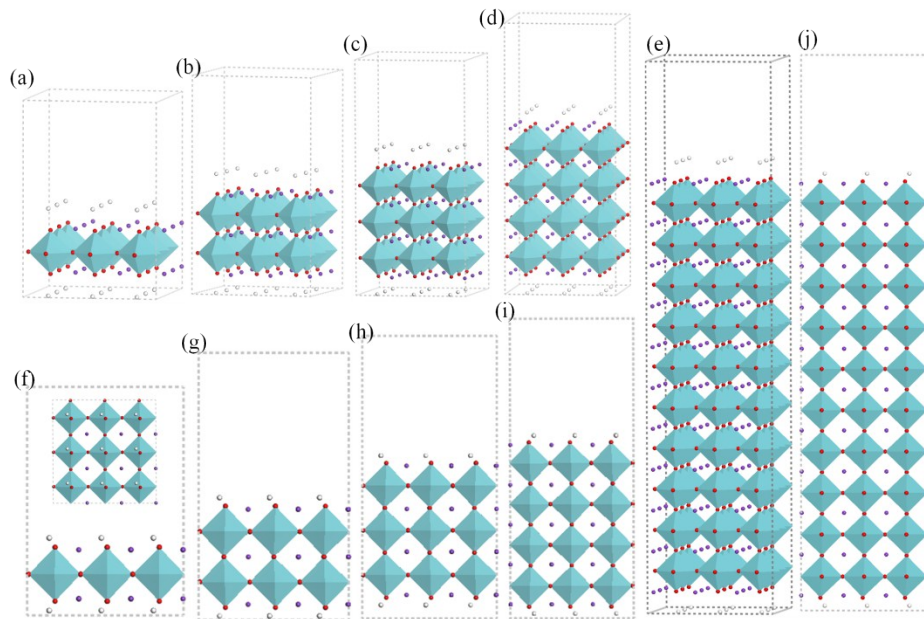

**Fig. S3** (a)-(e) As built models of 2D crystal with (100)<sub>orth</sub> orientation, their thickness varies from monolayer (0.4 nm) to ten layers (4 nm); (f)-(j) Stable crystal structure of (a)-(e) after fully lattice relaxation by DFT.

## 5. Calculated band structures of (100)<sub>orth</sub> oriented 2D crystal

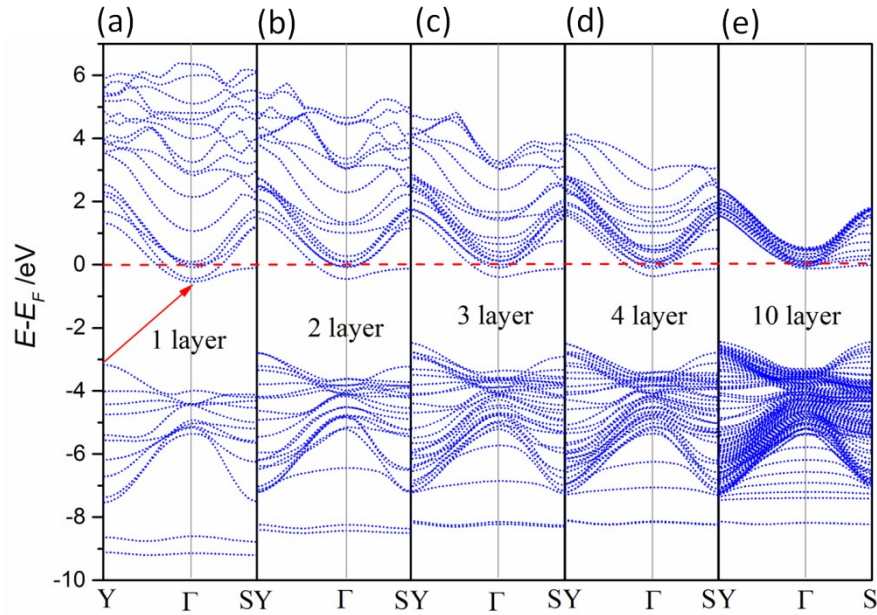

**Fig. S4** (a)-(e) Band structures of (100) facet 2D KNbO<sub>3</sub> with thickness range from monolayer (0.4 nm) to ten layers (4 nm). All of them show indirect band transition. Their  $t_{2g}$  band descend below  $E_F$  allowing the electrons moving freely on these bands. The optical band gap and the confined energy ( $E-E_F$ ) decrease gradually with an increase in thicknesses. The increase of quantum confinement leads to degenerate conduction band splitting into independent sub-bands.

## 6. Free electronic states occupation below $E_F$ of (100)<sub>orth</sub> oriented 2D crystals

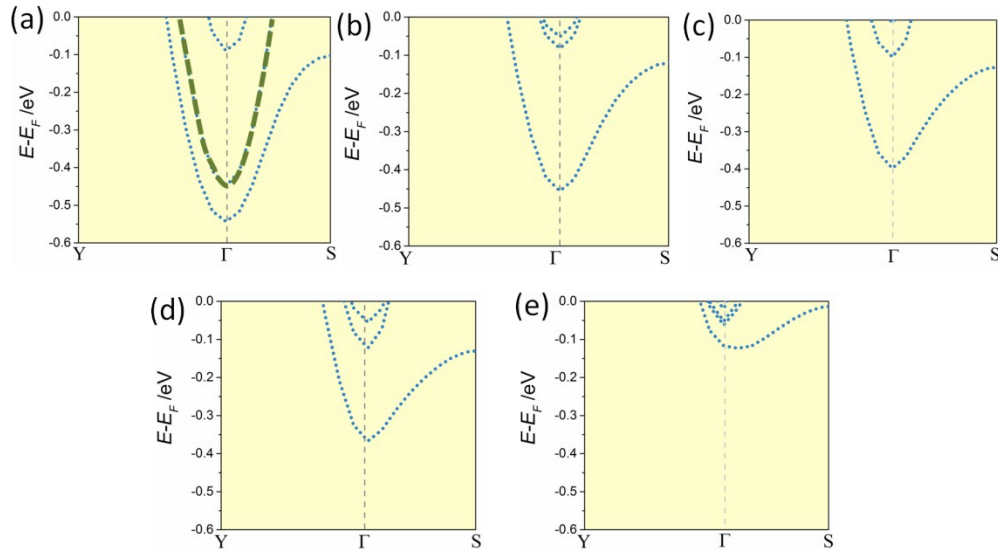

**Fig. S5.** (a)-(e) Free electronic states occupation of (100) facet 2D KNbO<sub>3</sub> with thickness range from monolayer (0.4 nm) to ten layers (4 nm). The confined energy ( $E-E_F$ ) decrease gradually with an increase in thickness. Under strong quantum confinement, One of the  $p$  band will extend to low energy (between split  $t_{2g}$  band), presenting as additional free electrons conductive band (marked by green dash line in figure S5(a)).



## 7. Insulator-metal transition behavior of free electrons absorptions of $(100)_{\text{orth}}$ oriented 2D $\text{KNbO}_3$ .

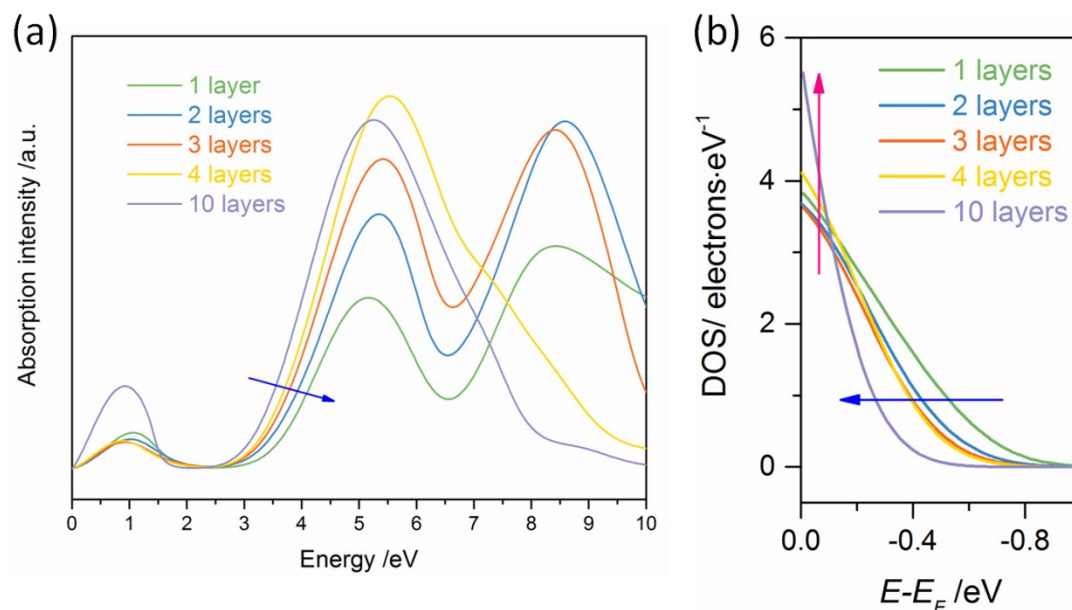

**Fig. S6.** (a) Absorption properties of  $(100)_{\text{orth}}$  oriented 2D  $\text{KNbO}_3$  models, the absorption in low frequency indicates an insulator-metal transition absorption. Strong quantum confinement can be observed from the variation of absorption band edges of models with a decrease in thickness. The anomalous absorption of ten layers model in the low-frequency range can be ascribed to the abrupt increase of the local DOS near  $E_F$ , as the red arrow indicated in (b).

## 8. Geometric structure models of $(120)_{\text{orth}}$ oriented 2D crystal

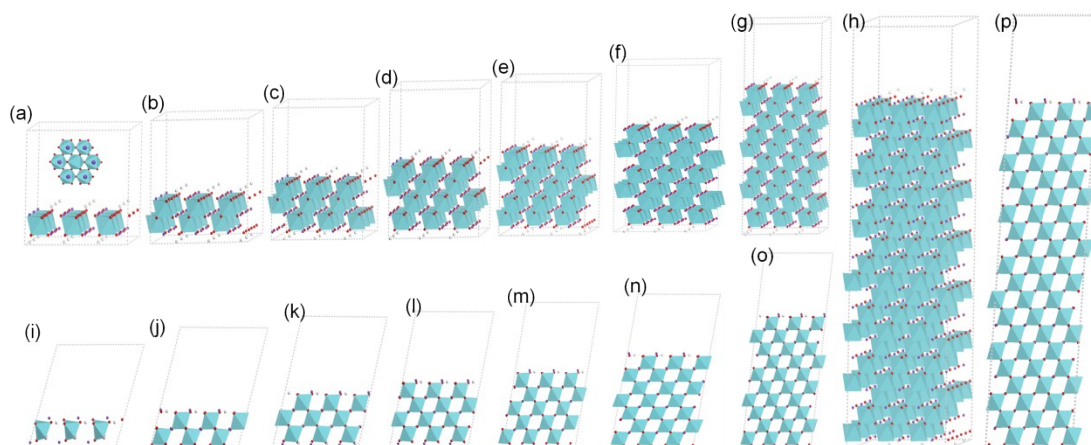

**Figure S7.** (a)-(h) As built models of 2D crystal with  $(120)_{\text{orth}}$  orientation, their thickness varies from monolayer (0.23 nm) to twenty layers (4.6 nm); (i)-(p) Stable crystal structure of (a)-(h) after fully lattice relaxation by DFT. A strong lattice distortion occurs after total energy minimization of monolayer model (comparing the (a) and (i)), showing a structural instability of mono-octahedral layer model with  $(120)_{\text{orth}}$  orientation.

## 9. Calculated band structures of (120)<sub>orth</sub> oriented 2D crystal

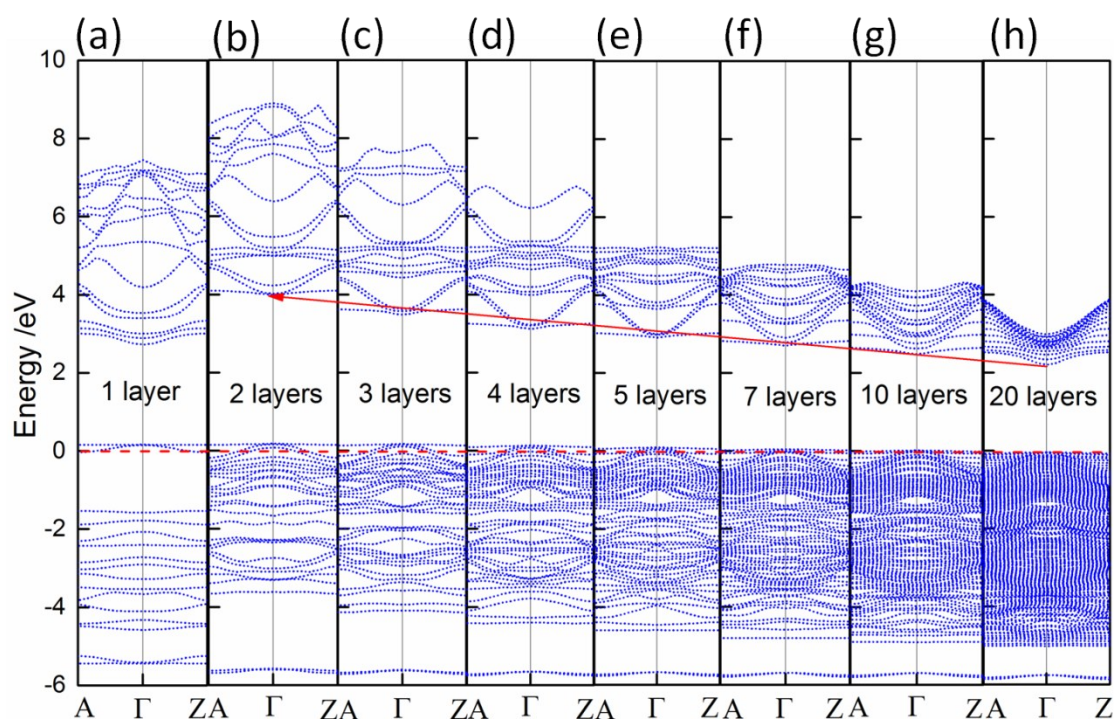

**Fig. S8** (a)-(h) Band structures of (120) facet 2D KNbO<sub>3</sub> with thickness range from monolayer (0.23 nm) to twenty layers (4.6 nm). All of them show a direct optical band transition. Their O 2*p* band lift up above  $E_F$  allowing the holes moving freely on these bands. The optical band gap and the confined energy ( $E-E_F$ ) decrease gradually with an increase in thicknesses. The abnormal band structure of the mono-octahedral layer (a) can be ascribed to the anomaly of its geometric structure in figure S7(i).

## 10. Calculated electronic structures of bulk KNbO<sub>3</sub> crystal

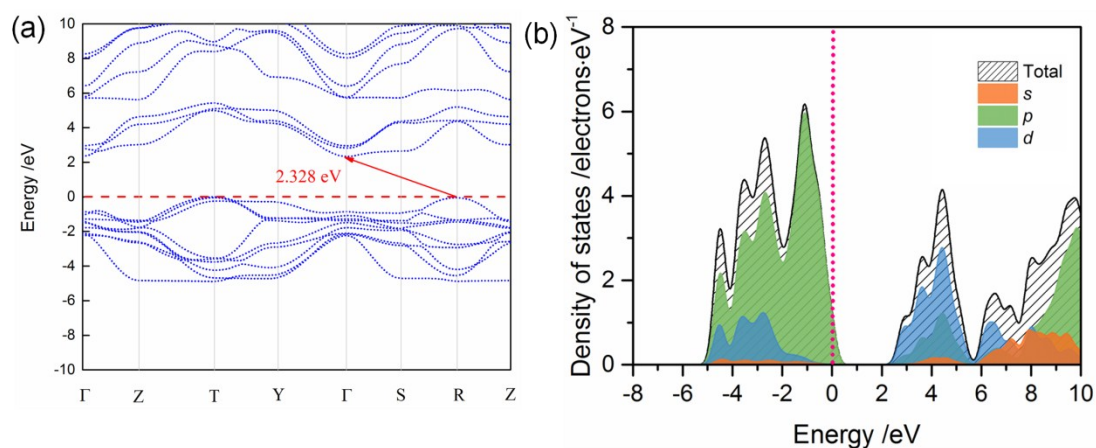

**Fig. S9.** (a) Calculated band structure of Amm2 orthorhombic KNbO<sub>3</sub> crystal. An indirect band gap of 2.328 eV can be obtained by the PBE functional calculation. (b) Calculated PDOS of KNbO<sub>3</sub> crystal, showing that the conduction band is constructed by the hybridization of *p*, *d* states, the valence band is constructed by O 2*p* states.

## References

1. Segall, M. D.; Lindan, P. J. D.; Probert, M. J.; Pickard, C. J.; Hasnip, P. J.; Clark, S. J.; Payne, M. C. *J. Phys.: Condens. Matter.* **2002**, 14, (11), 2717.
2. Perdew, J. P.; Burke, K.; Ernzerhof, M. *Phys.Rev.Lett.* **1996**, 77, (18), 3865-3868.
3. Bi, Y.; Ouyang, S.; Umezawa, N.; Cao, J.; Ye, J. *J.Am.Chem.Soc.* **2011**, 133, (17), 6490-2.
